# Supplementary material for: Value of SOFA, APACHE IV and SAPS II scoring systems in predicting short-term mortality in patients with acute myocarditis
Source: PubMed Central journal article supplement (PMC5609904; doi:10.18632/oncotarget.18634), 2017-06-27
Supplement: oncotarget-08-63073-s001.pdf [file oncotarget-08-63073-s001.pdf]

## Value of SOFA, APACHE IV and SAPS II scoring systems in predicting short-term mortality in patients with acute myocarditis

### SUPPLEMENTARY TABLES

**Supplementary Table 1: Echocardiographic data of patients with acute myocarditis**

| Clinical variables                           | Survival (n=250) | Death (n=55) | <i>p</i> Value |
|----------------------------------------------|------------------|--------------|----------------|
| echocardiographic parameters                 |                  |              |                |
| LVEF (%)                                     | 54.43±0.79       | 44.13±1.74   | <0.001         |
| LA dimension (mm)                            | 33.18±0.57       | 35.73±1.16   | 0.213          |
| LVEDd (mm)                                   | 48.71±0.58       | 49.04±1.12   | 0.059          |
| IVS (mm)                                     | 10.33±0.46       | 10.23±0.48   | 0.403          |
| Ventricular wall motion abnormalities, n (%) | 96 (38.4%)       | 40 (72.7%)   | <0.001         |

LVEF, left ventricular ejection fraction; LA, left aortal atrium; LVEDd, end-diastolic left ventricular diameter; IVS, intraventricular septum diameter. Values are expressed as mean ± SE; test for differences between survived and dead groups.

Supplementary Table 2: Etiology of patients with acute myocarditis

| Etiologies             | Survival | Death | <i>p</i> Value |
|------------------------|----------|-------|----------------|
| Virus <sup>a</sup>     |          |       |                |
| Coxsackie virus,n      | 16       | 5     | 0.422          |
| Epstein-Barr virus,n   | 13       | 3     | 0.574          |
| Cytomegalovirus,n      | 9        | 3     | 0.468          |
| Rubella virus,n        | 6        | 2     | 0.522          |
| HSV1,n                 | 3        | 1     | 0.610          |
| Influenza A virus,n    | 4        | 1     | 0.729          |
| Influenza B virus,n    | 3        | 0     | 0.496          |
| Parvovirus B19,n       | 2        | 0     | 0.629          |
| Echovirus,n            | 1        | 0     | 0.795          |
| HPIVs,n                | 1        | 0     | 0.795          |
| Bacterial              |          |       |                |
| Mycoplasma pneumonia,n | 8        | 2     | 0.565          |
| Toxins                 |          |       |                |
| Cocaine,n              | 0        | 1     | 0.180          |
| Paint,n                | 1        | 0     | 0.820          |

<sup>a</sup>Data on determinations of virus infection were available for 140 survival and 36 death participants; n indicates number of individuals; HSV1, herpes simplex virus type 1; HPIVs, human parainfluenza virus. Values are expressed as number of participants; test for differences between survived and dead groups.
